# Supplementary material for: Dual time point based quantification of metabolic uptake rates in 18F-FDG PET
Source: PubMed Central journal article supplement (PMC3717002; doi:10.1186/2191-219x-3-16), 2013-03-13
Supplement: 2191-219X-3-16-S1.pdf [file 2191-219X-3-16-S1.pdf]

## Derivation of Eq. 12 in

### “Dual time point based quantification of metabolic uptake rates in <sup>18</sup>F-FDG PET”

J. van den Hoff et. al.

Starting point is Eq. 11 in the publication

$$\Delta c_t(\Delta t) = c_t^+ - c_t^- = K_m \cdot \int_{t_0 - \frac{\Delta t}{2}}^{t_0 + \frac{\Delta t}{2}} c_a(s) ds + V_r \cdot (c_a^+ - c_a^-) \quad (1)$$

with  $c_a^\pm = c_a(t_0 \pm \frac{\Delta t}{2})$ . Using the Taylor expansion of  $c_a(t)$

$$c_a(t) = c_a^0 \cdot \sum_{n=0}^{\infty} \frac{(-1)^n}{n!} \left( \frac{t - t_0}{\tau_n} \right)^n$$

the integral in Eq. 1 can be calculated:

$$\begin{aligned} \int_{t_0 - \frac{\Delta t}{2}}^{t_0 + \frac{\Delta t}{2}} c_a(s) ds &= c_a^0 \cdot \sum_{n=0}^{\infty} \frac{(-1)^n}{n!} \int_{t_0 - \frac{\Delta t}{2}}^{t_0 + \frac{\Delta t}{2}} \left( \frac{s - t_0}{\tau_n} \right)^n \\ &= c_a^0 \cdot \sum_{n=0}^{\infty} \frac{(-1)^n}{n!} \frac{\tau_n}{n+1} \left( \frac{s - t_0}{\tau_n} \right)^{n+1} \Big|_{t_0 - \frac{\Delta t}{2}}^{t_0 + \frac{\Delta t}{2}} \\ &= c_a^0 \cdot \sum_{n=0}^{\infty} \frac{(-1)^n}{(n+1)!} \cdot \tau_n \cdot \left[ \left( \frac{\Delta t}{2\tau_n} \right)^{n+1} - \left( -\frac{\Delta t}{2\tau_n} \right)^{n+1} \right]. \end{aligned}$$

All terms with even powers of  $\frac{\Delta t}{2\tau_n}$  vanish (i.e. when  $n$  is odd) resulting in

$$\begin{aligned} \int_{t_0 - \frac{\Delta t}{2}}^{t_0 + \frac{\Delta t}{2}} c_a(s) ds &= c_a^0 \cdot \left[ \Delta t + \frac{\tau_2}{24} \left( \frac{\Delta t}{\tau_2} \right)^3 + \dots \right] \\ &= c_a^0 \cdot \Delta t \cdot \left[ 1 + \frac{1}{24} \left( \frac{\Delta t}{\tau_2} \right)^2 + \dots \right]. \end{aligned} \quad (2)$$

where the first two non-vanishing terms of the sum are explicitly given and higher order terms are indicated by the ellipsis.

The difference term  $(c_a^+ - c_a^-)$  is computed accordingly:

$$\begin{aligned} c_a^+ - c_a^- &= c_a^0 \cdot \sum_{n=0}^{\infty} \frac{(-1)^n}{n!} \left[ \left( \frac{\Delta t}{2\tau_n} \right)^n - \left( -\frac{\Delta t}{2\tau_n} \right)^n \right] \\ &= -c_a^0 \cdot \left[ \frac{\Delta t}{\tau_1} + \frac{1}{24} \left( \frac{\Delta t}{\tau_3} \right)^3 + \dots \right] \\ &= -c_a^0 \cdot \Delta t \cdot \frac{1}{\tau_1} \left[ 1 + \frac{1}{24} \frac{\tau_1}{\tau_3} \left( \frac{\Delta t}{\tau_3} \right)^2 + \dots \right] \end{aligned} \quad (3)$$

where again all terms with even powers of  $\frac{\Delta t}{2\tau_n}$  vanish (i.e. when  $n$  is even). Inserting (2) and (3) in (1) and neglecting fourth and higher order terms leads to Eq. 12 in the publication:

$$\Delta c_t = \left( K_m \left[ 1 + \frac{1}{24} \left( \frac{\Delta t}{\tau_2} \right)^2 \right] - \frac{V_r}{\tau_1} \left[ 1 + \frac{1}{24} \frac{\tau_1}{\tau_3} \left( \frac{\Delta t}{\tau_3} \right)^2 \right] \right) c_a^0 \cdot \Delta t.$$
